# Supplementary material for: Effects of inulin-type fructans supplementation on cardiovascular disease risk factors: a protocol for a systematic review and meta-analysis of randomised controlled trials
Source: HighWire-hosted journal article supplement (doi:10.1136/bmjopen-2021-058875), 2022-07-01
Supplement: bmjopen-2021-058875supp002_data_supplement.pdf [file bmjopen-2021-058875supp002_data_supplement.pdf]

1 **Supplementary document 2**

2

3 **The effect of inulin-type fructans supplementation on cardiovascular disease risk factors: A**  
4 **protocol for a systematic review and meta-analysis of controlled trials**

5

6 **Supplementary document 2: Rules for converting outcome data**

7

8 We will use the following rules to convert outcome data prior to meta-analysis:

9 1. Fasting blood glucose will be converted from mg/dl to mmol/l by dividing by 18 that is

10  $\text{mmol/l} = \text{mg/dl} / 18$  (1).

11 2. HDL, LDL, VLDL and TC will be converted from mg/dl to mmol/l by multiplying by

12 0.02586 (1).

13 3. Triglycerides will be converted from mg/dl to mmol/l by multiplying by 0.01129 (1).

14 4. ApoA, ApoB will be converted from mg/l to g/l by dividing by 1000 (1).

15 5. HbA1C will be converted from mmol/mol to % using the following formula: NGSP =

16  $(0.09148 * \text{IFCC}) + 2.152$  (2).

17 6. Studies that reported results as medians will be converted to means using the following

18 formula obtained from Hozo 2005 et al.  $\bar{x} \approx \frac{a + 2m + b}{4}$  (3).

19 7. Measures of variability will be converted from SE and 95% confidence interval to SD

20 using the following formulas obtained from the Cochrane Handbook (chapter 6) (4).

21 
$$\text{SD} = \text{SE} \times \sqrt{N}$$

22

23 
$$\text{SD} = \sqrt{N} \times (\text{upper limit} - \text{lower limit}) / 3.92$$

24

25 8. Ranges will be converted to SD using the following formula from Wan 2014 et al. (5).

26 
$$S \approx \frac{b - a}{2\Phi^{-1}\left(\frac{n - 0.375}{n + 0.25}\right)}$$

27

26 **References**

27

- 28 1. Society for Biomedical Diabetes Research. SI Unit Conversion Calculator 2015 [cited  
29 2022 February]. Available from: [http://www.soc-](http://www.soc-bdr.org/rds/authors/unit_tables_conversions_and_genetic_dictionaries/e5196/index_en.html)  
30 [bdr.org/rds/authors/unit\\_tables\\_conversions\\_and\\_genetic\\_dictionaries/e5196/index\\_en.html](http://www.soc-bdr.org/rds/authors/unit_tables_conversions_and_genetic_dictionaries/e5196/index_en.html).
- 31 2. National Glycohemoglobin Standardization Program [NGSP]. IFCC Standardization of  
32 HbA1c 2010. Available from:  
33 [http://www.ngsp.org/ifccngsp.asp#:~:text=In%202007%2C%20the%20IFCC%20recommended,](http://www.ngsp.org/ifccngsp.asp#:~:text=In%202007%2C%20the%20IFCC%20recommended,between%20NGSP%20and%20IFCC%20results)  
34 [between%20NGSP%20and%20IFCC%20results](http://www.ngsp.org/ifccngsp.asp#:~:text=In%202007%2C%20the%20IFCC%20recommended,between%20NGSP%20and%20IFCC%20results).
- 35 3. Hozo SP, Djulbegovic B, Hozo I. Estimating the mean and variance from the median,  
36 range, and the size of a sample. *BMC Medical Research Methodology*. 2005;5(1):13.
- 37 4. Higgins JPT, Thomas J, Chandler J, Cumpston M, Li T, Page MJ, et al., editors.  
38 *Cochrane Handbook for Systematic Reviews of Interventions* version 6.2 (updated February  
39 2021): Cochrane, 2021. Available from [www.training.cochrane.org/handbook](http://www.training.cochrane.org/handbook).; 2021.
- 40 5. Wan X, Wang W, Liu J, Tong T. Estimating the sample mean and standard deviation  
41 from the sample size, median, range and/or interquartile range. *BMC Medical Research*  
42 *Methodology*. 2014;14(1):135.

43
